# Supplementary material for: Identification and analysis of cuproptosis associated molecular clusters and immunological profiles in atopic dermatitis
Source: Frontiers journal article supplement (doi:10.3389/fimmu.2025.1545457), 2025-06-27

**Figure S1.** The ssGSEA results using the GSE65832 bulk RNA-seq dataset (AD vs. healthy controls)

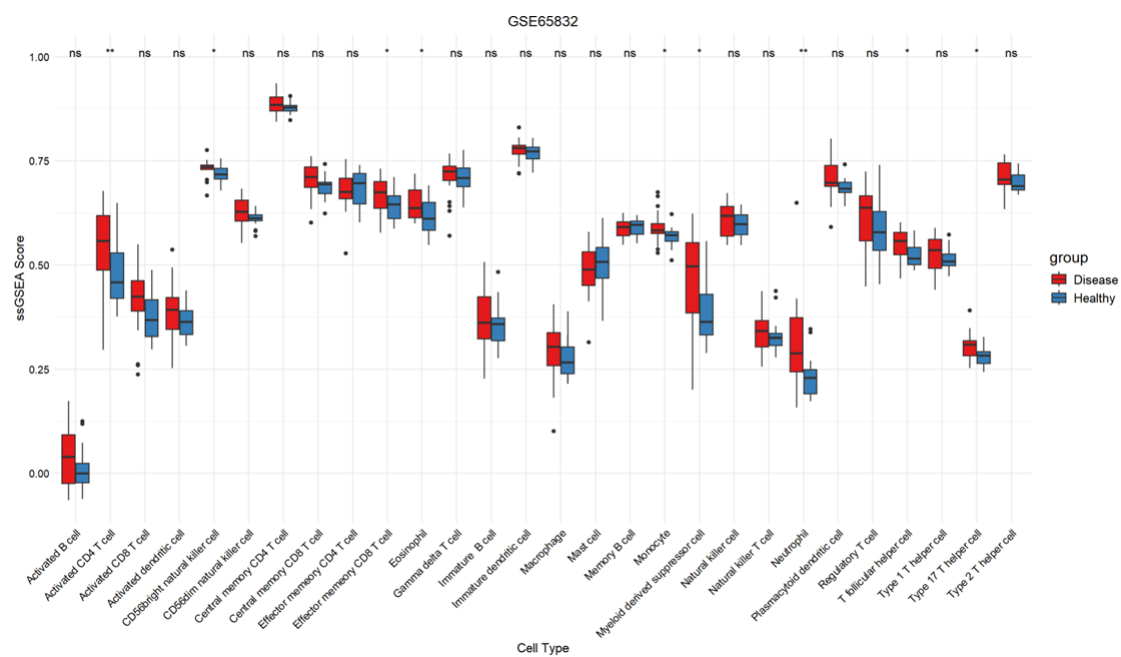

**Figure S2.** (A) UMAP plots of scRNA-seq data (GSE269981) showing immune cell clusters (T cells, B cells, neutrophils, NK cells) in AD lesional vs. healthy skin. (B) Bar plots quantifying immune cell frequencies. AD lesions exhibited higher CD4 T cells, B cells, neutrophils and dendritic cells compared to healthy controls.

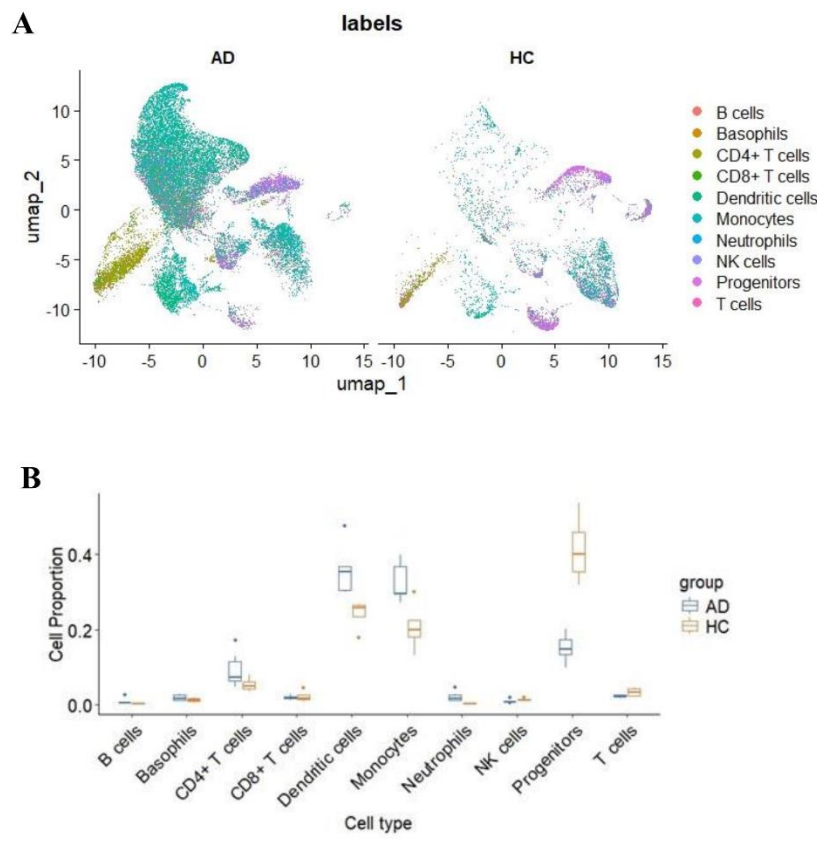

Supplement: Data_Sheet_7.pdf [file Data_Sheet_7.pdf]
